# Supplementary material for: Published registered reports are rare, limited to one journal group and inadequate for randomized controlled trials in the clinical field
Source: bioRxiv or medRxiv preprint supplement (doi:10.1101/2022.08.02.22278318), 2023-04-03
Supplement: Supplementary file [file media-1.pdf]

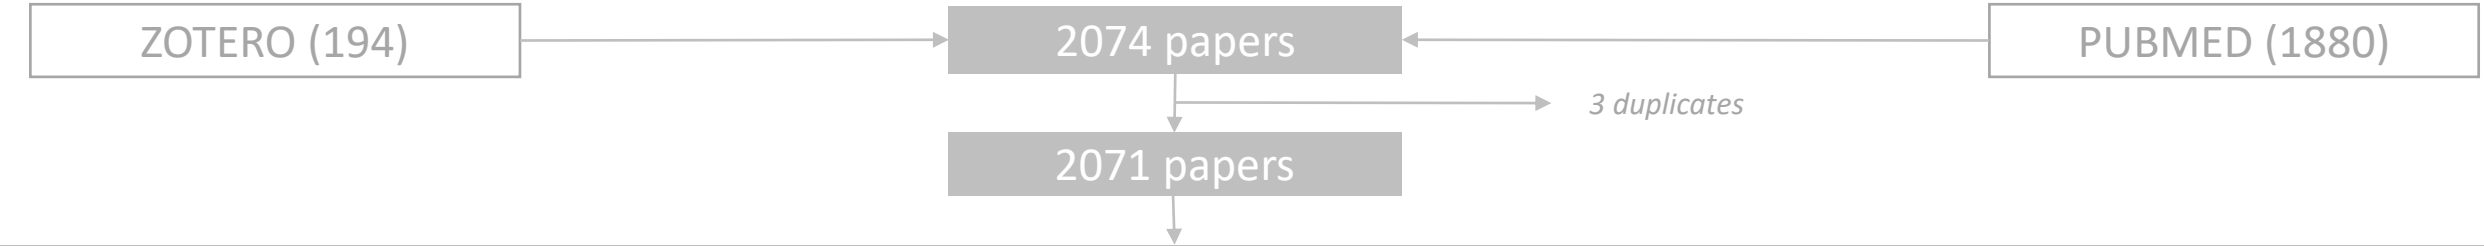

Random sample (100 papers)

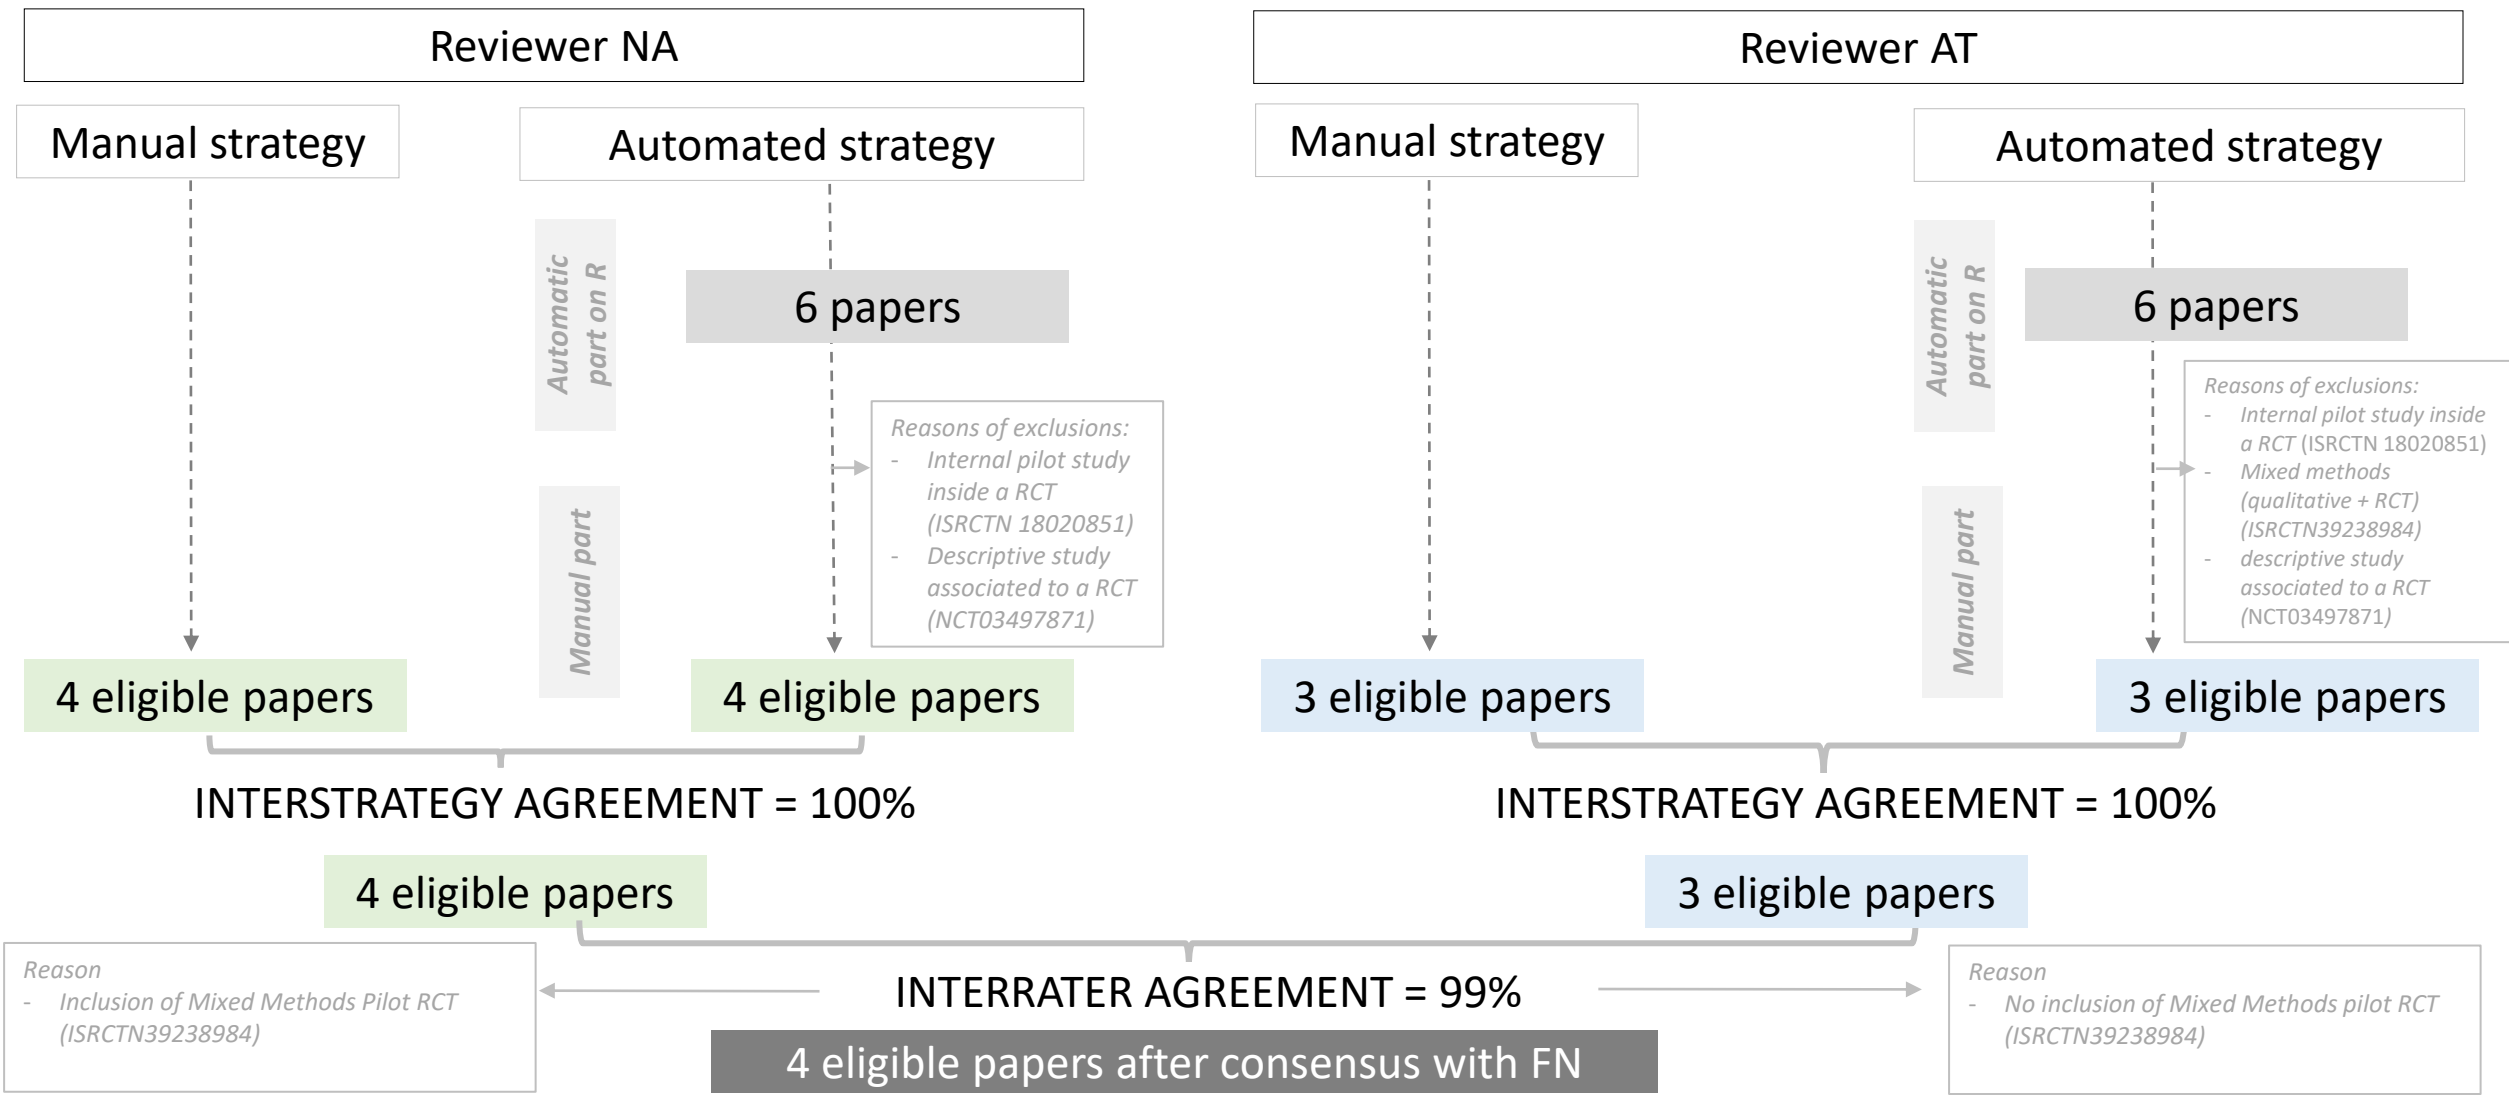

*Reasons of exclusions:*

- Internal pilot study inside a RCT (ISRCTN 18020851)
- Descriptive study associated to a RCT (NCT03497871)

*Reasons of exclusions:*

- Internal pilot study inside a RCT (ISRCTN 18020851)
- Mixed methods (qualitative + RCT) (ISRCTN39238984)
- descriptive study associated to a RCT (NCT03497871)

*Reason*

- Inclusion of Mixed Methods Pilot RCT (ISRCTN39238984)

*Reason*

- No inclusion of Mixed Methods pilot RCT (ISRCTN39238984)
